# Supplementary material for: Mediation pathways and effects of green structures on respiratory mortality via reducing air pollution
Source: PubMed Central journal article supplement (PMC5322332; doi:10.1038/srep42854), 2017-02-23
Supplement: srep42854-s1.pdf [file srep42854-s1.pdf]

**Mediation pathways and effects of green structures on respiratory mortality via  
reducing air pollution**

Yu-Sheng Shen<sup>a</sup>      Shih-Chun Candice Lung<sup>a, b, c, \*</sup>

<sup>a</sup> Research Center for Environmental Changes, Academia Sinica, Taipei, Taiwan.

<sup>b</sup> Department of Atmospheric Sciences, National Taiwan University, Taipei, Taiwan

<sup>c</sup> Institute of Environmental Health, National Taiwan University, Taipei, Taiwan

\*Corresponding author, Research Center for Environmental Changes, Academia Sinica, No. 128, Sec. 2, Academia Rd, Nangang, Taipei, Taiwan 11529; Tel: 886-2-26539885 ext. 277, Fax: 886-2-27833584, Email: sclung@rcec.sinica.edu.tw.

## Supplementary Information

### 1. Indicators of landscape metrics

Table S1. Indicators of landscape metrics (class level)

| Indicator                                             | Formula                                                                                                                                                                                                                                                                                                                   | Unit                    |
|-------------------------------------------------------|---------------------------------------------------------------------------------------------------------------------------------------------------------------------------------------------------------------------------------------------------------------------------------------------------------------------------|-------------------------|
| Percentage of Landscape (PLAND)                       | $\left( \sum_{j=1}^n a_{ij} / A \right) (100)$<br>$a_{ij}$ : area of patch $j$ (class $i$ ).<br>$A$ : total landscape area.                                                                                                                                                                                               | %                       |
| Aggregation Index (AI)                                | $[g_{ss} / (\max \rightarrow g_{ss})] (100)$<br>$g_{ss}$ : number of like adjacencies between pixels of patch type (class) $s$ obtained using the single-count method.<br>$\max \rightarrow g_{ss}$ : maximum number of like adjacencies between pixels of patch type (class) $s$ obtained using the single-count method. | %                       |
| Percentage of Like Adjacencies (PLADJ)                | $\left( g_{ii} / \sum_{k=1}^m g_{ik} \right) (100)$<br>$g_{ii}$ : number of like adjacencies between pixels of patch type (class) $i$ obtained using the double-count method.<br>$g_{ik}$ : number of adjacencies between pixels of patch types (classes) $i$ and $k$ obtained using the double-count method.             | %                       |
| Patch Density (PD)                                    | $(n_i / A) (10,000) (100)$<br>$n_i$ : number of patches in the landscape of patch type (class) $i$ .<br>$A$ : as previously defined.                                                                                                                                                                                      | Number per 100 hectares |
| Mean Nearest Neighbor Distance (ENN_MN)               | $\sum_{j=1}^{n'} h_{ij} / n'_i$<br>$h_{ij}$ : distance between patch $j$ (class $i$ ) and patch of the corresponding class.<br>$n'_i$ : number of patches in the landscape of patch type (class) $i$ with nearest neighbor distance.                                                                                      | Meters                  |
| Area-Weighted Mean Nearest Neighbor Distance (ENN_AM) | $\sum_{j=1}^n \left[ h_{ij} \left( a_{ij} / \sum_{j=1}^n a_{ij} \right) \right]$<br>$h_{ij}, a_{ij}$ : as defined above.                                                                                                                                                                                                  | Meters                  |
| Largest Patch Index (LPI)                             | $(MAX (a_{ij}) / A) (100)$<br>$a_{ij}, A$ : as defined above.                                                                                                                                                                                                                                                             | %                       |

Source: Leitão et al. (2006); McGarigal and Marks (1995).

## **2.Calculation of the ratio of secondary aerosols to primary aerosols**

The detail calculation of secondary aerosols/primary aerosols includes four steps. Those steps are as follow:

### **Step 1: Obtaining the SOC/OC and POC/OC from results of Chou et al. (2010).**

$$\text{SOC/OC} = \text{SOC}/(\text{SOC}+\text{POC}) = \text{five-years mean of SOC}/(\text{five-years mean of SOC} + \text{five-years mean of POC}) = 2.12/(2.12+4.78) \doteq 0.307$$

$$\text{POC/OC} = 1 - (\text{SOC/OC}) \doteq 0.693$$

### **Step 2: Using the SOC/OC and POC/OC ratios to calculate the approximate concentration of SOC and POC in OC component in Chang et al. (2010)**

$$\text{SOC} = 0.307 \times 5 = 1.535$$

$$\text{POC} = 0.693 \times 5 = 3.465$$

### **Step 3: Summing up the primary aerosols from EC and POC, and summing up the secondary sources from SOC, $\text{SO}_4^{2-}$ , and $\text{NO}_3^-$ in Chang et al. (2010)**

$$\text{primary aerosols} = \text{EC} + \text{POC} = 1.6 + 3.465 = 5.065$$

$$\text{secondary aerosols} = \text{SOC} + \text{SO}_4^{2-} + \text{NO}_3^- = 1.535 + 6.4 + 1.8 = 9.735$$

### **Step 4: Calculating the ratio of secondary aerosols to primary aerosols**

$$\text{secondary aerosols/primary aerosols} = 9.735/5.065 = 1.9$$
